# Supplementary material for: Shared and unique phosphoproteomics responses in skeletal muscle from exercise models and in hyperammonemic myotubes
Source: PubMed Central journal article supplement — iScience. 2022 Oct 10;25(11):105325. doi: 10.1016/j.isci.2022.105325 (PMC9636548; doi:10.1016/j.isci.2022.105325), 2022-10-10
Supplement: mmc1.pdf [file mmc1.pdf]

**Supplemental information**

**Shared and unique phosphoproteomics responses in  
skeletal muscle from exercise models  
and in hyperammonemic myotubes**

**Nicole Welch, Shashi Shekhar Singh, Ryan Musich, M. Shahid Mansuri, Annette Bellar, Saurabh Mishra, Aruna K. Chelluboyina, Jinendiran Sekar, Amy H. Attaway, Ling Li, Belinda Willard, Troy A. Hornberger, and Srinivasan Dasarathy**



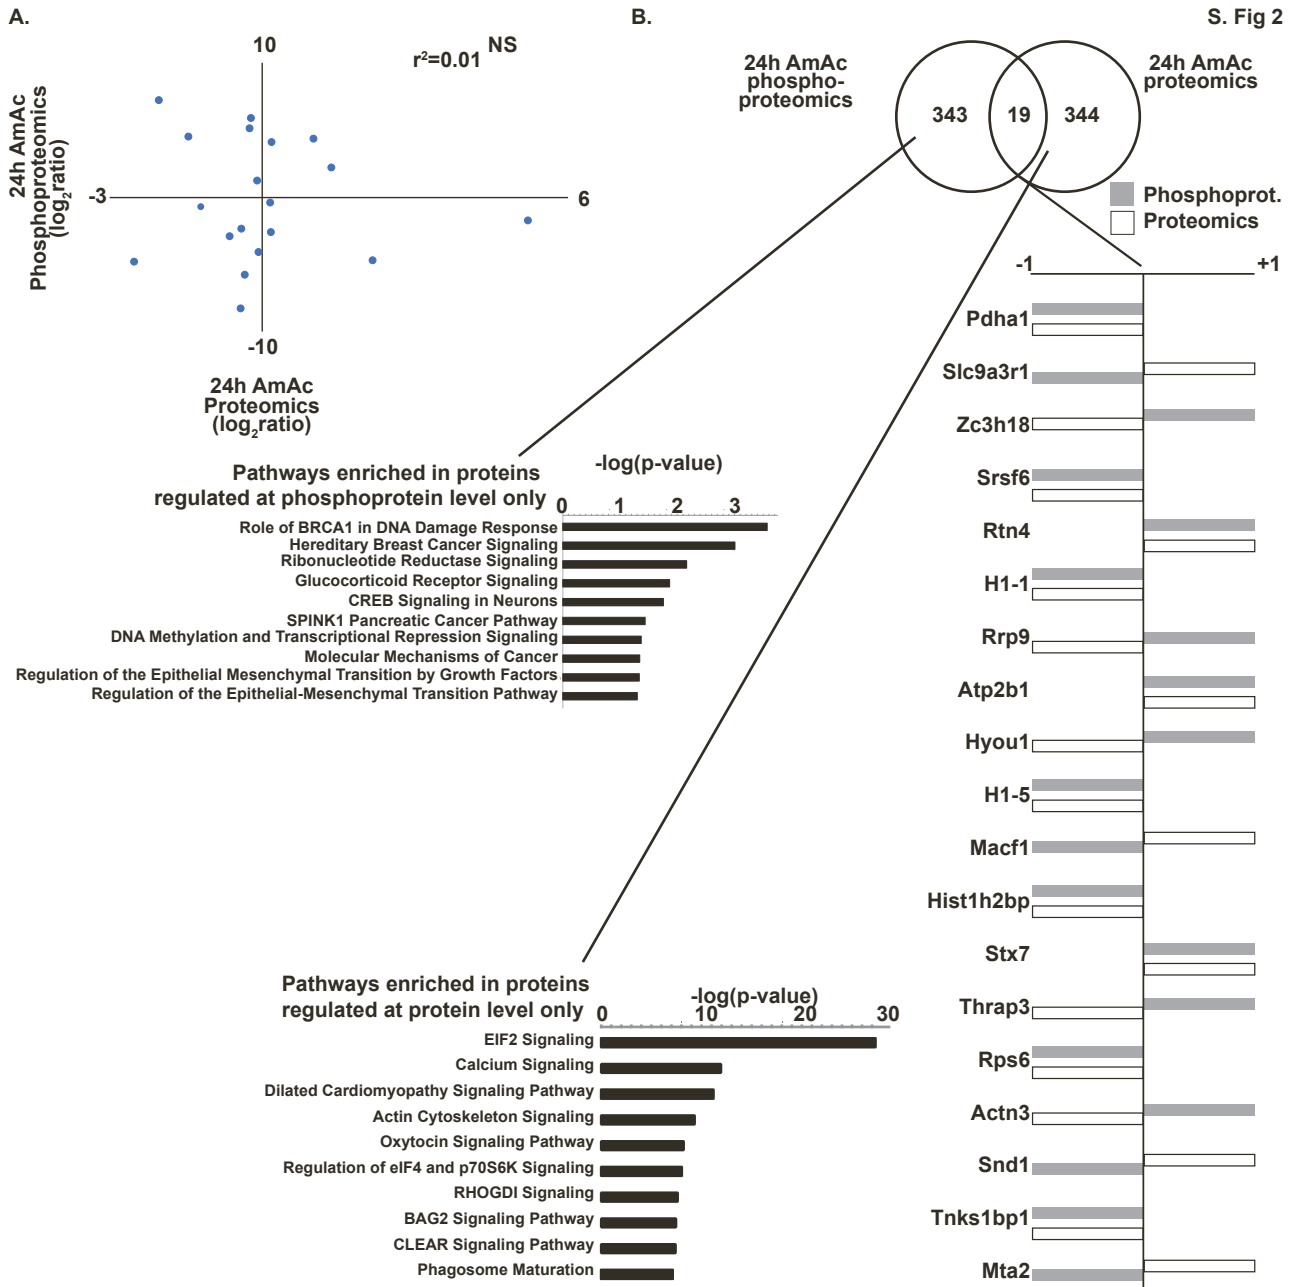

A. 6hAmAc Unique DEpP

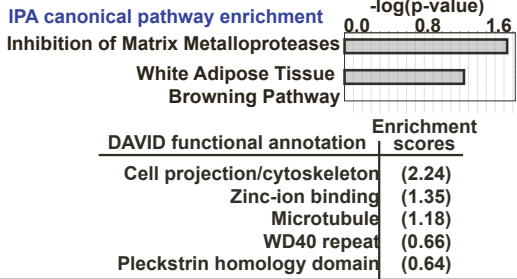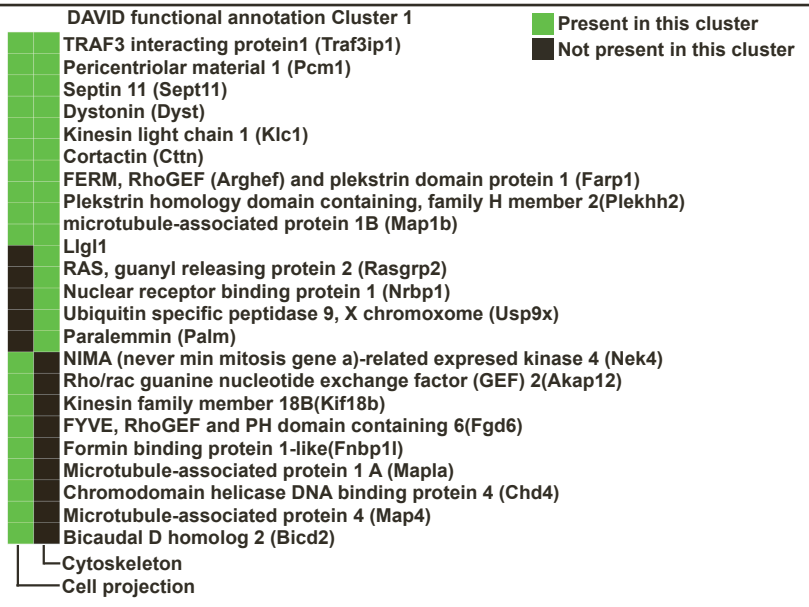

B. 24hAmAc Unique DEpP

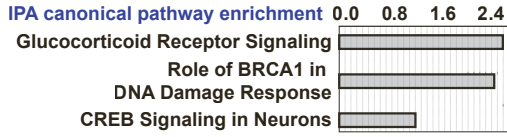

DAVID functional annotation Cluster 1 ■ Present in this cluster ■ Not present in this cluster

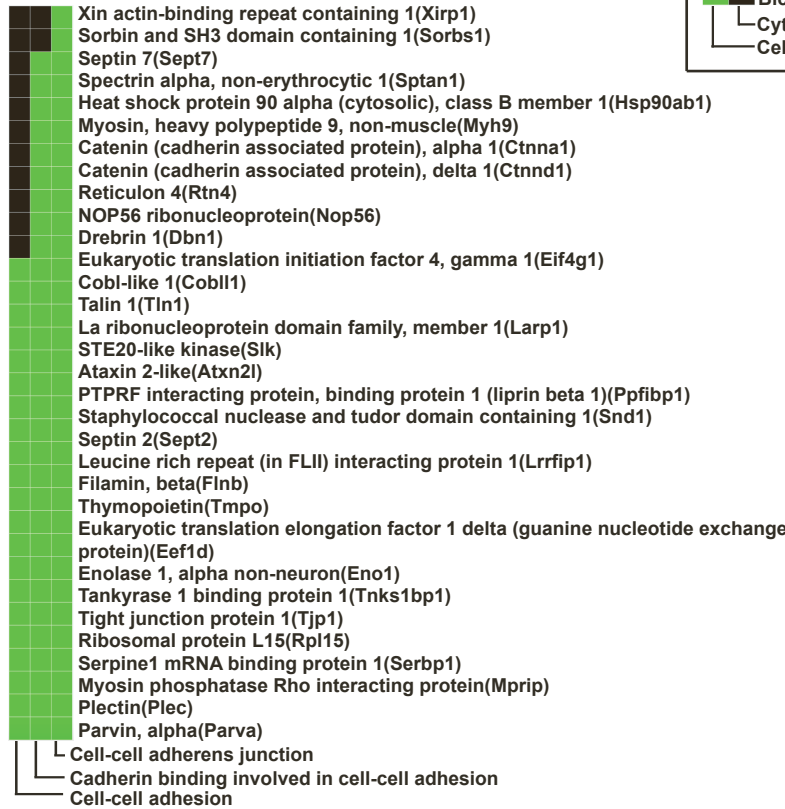

| DAVID functional annotation                       | Enrichment scores |
|---------------------------------------------------|-------------------|
| Cell-cell adhesion                                | (1.94)            |
| Calmodulin-binding                                | (1.09)            |
| G-protein coupled signaling                       | (0.80)            |
| Zinc-ion binding                                  | (0.76)            |
| Protein serine/threonine/tyrosine kinase activity | (0.71)            |
| Immunoglobulin-like domain                        | (0.69)            |
| Pleckstrin homology domain                        | (0.62)            |
| PWWP                                              | (0.62)            |

C. 6h and 24hAmAc Shared

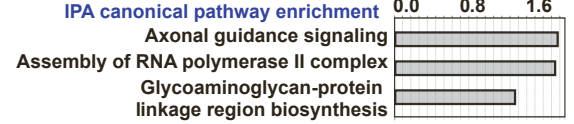

DAVID functional annotation Cluster 1 ■ Present in this cluster ■ Not present in this cluster

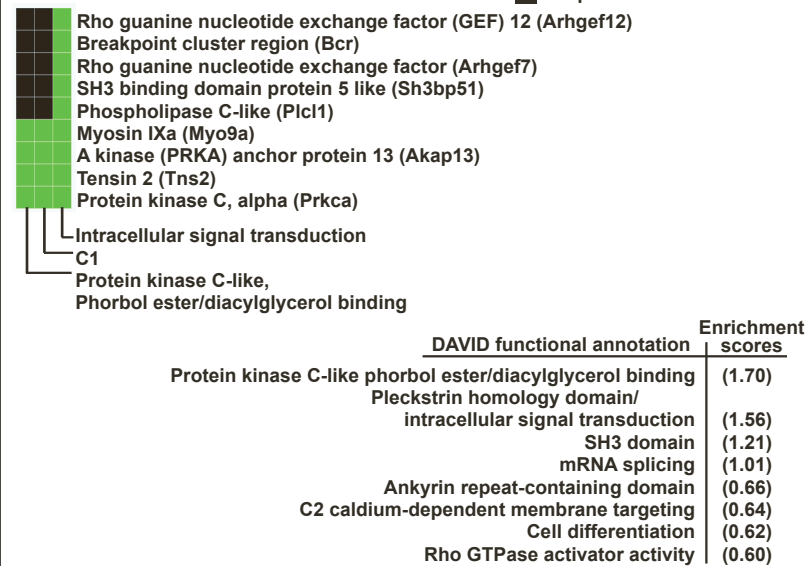

| DAVID functional annotation                                   | Enrichment scores |
|---------------------------------------------------------------|-------------------|
| Protein kinase C-like phorbol ester/diacylglycerol binding    | (1.70)            |
| Pleckstrin homology domain/ intracellular signal transduction | (1.56)            |
| SH3 domain                                                    | (1.21)            |
| mRNA splicing                                                 | (1.01)            |
| Ankyrin repeat-containing domain                              | (0.66)            |
| C2 caldium-dependent membrane targeting                       | (0.64)            |
| Cell differentiation                                          | (0.62)            |
| Rho GTPase activator activity                                 | (0.60)            |

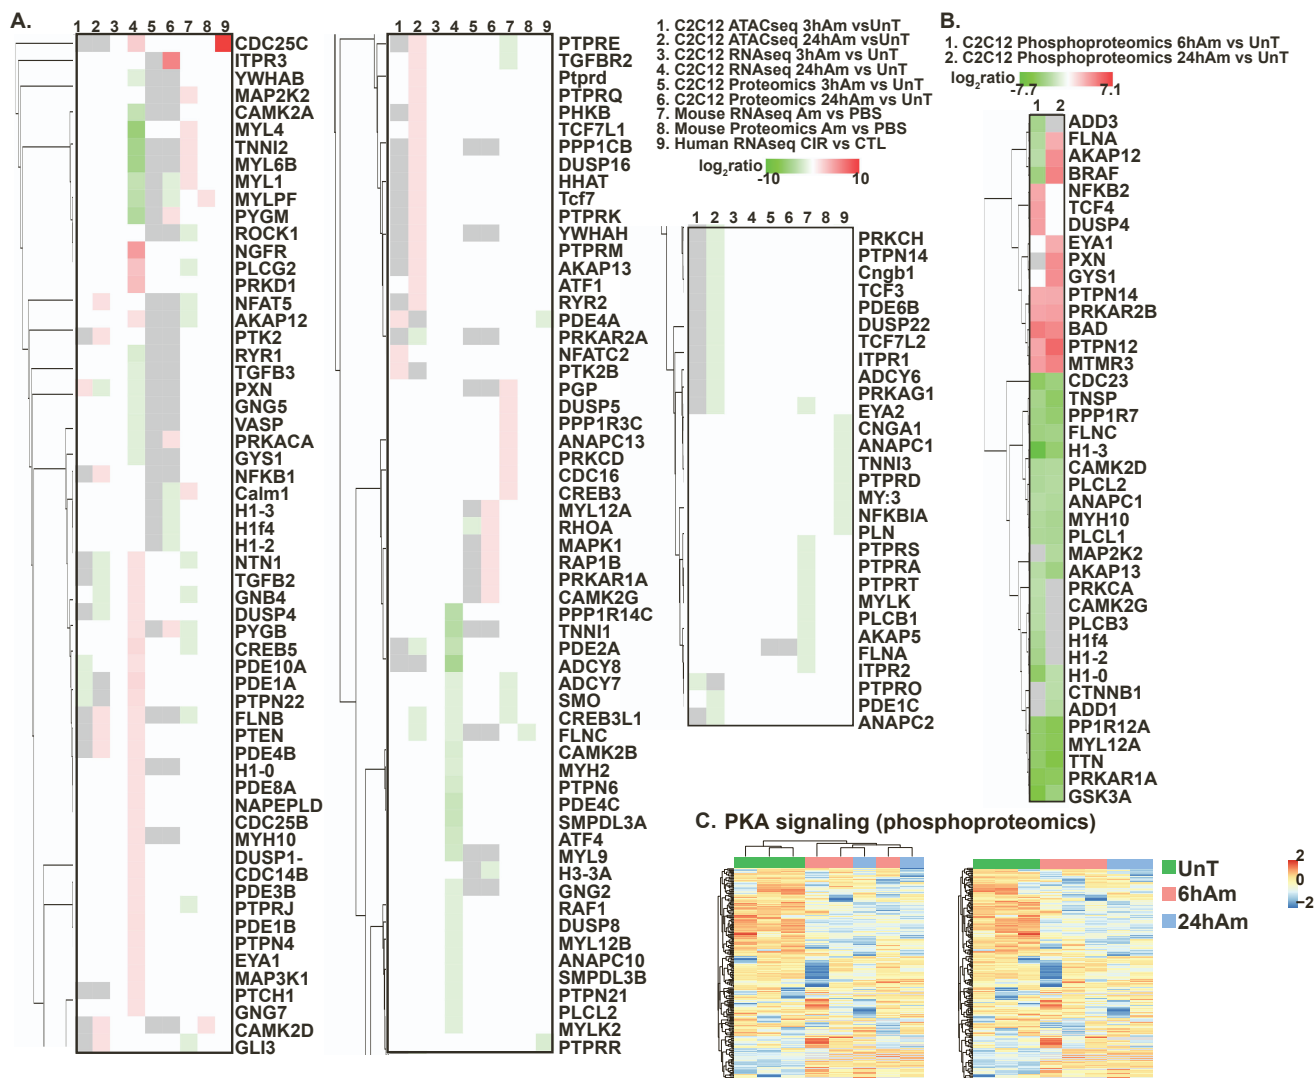

**A. CDKs**

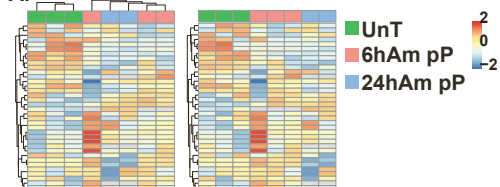

**B. Polo-like kinase signaling**

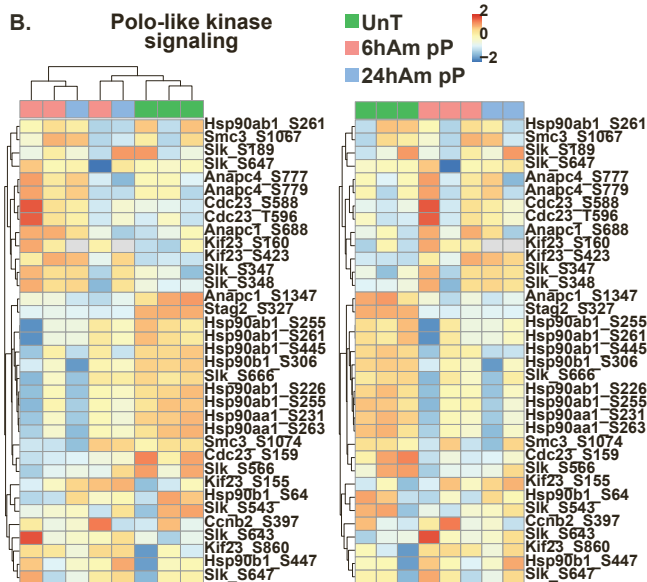

**D. HIPPO signaling**

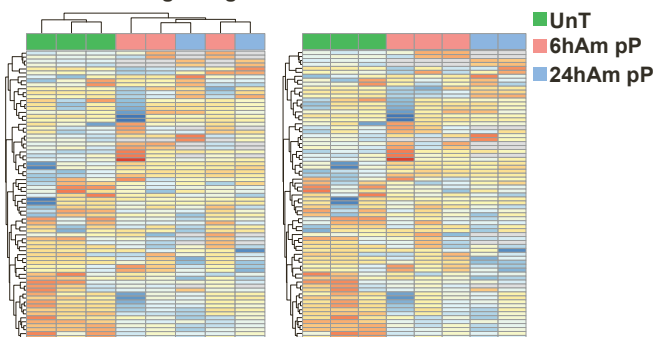

**C.**

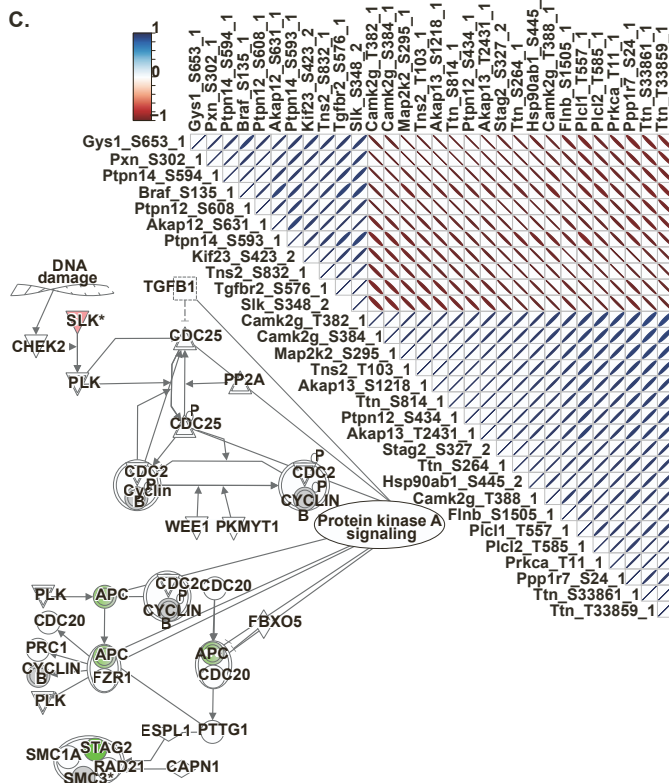

**E. HIF1α signaling**

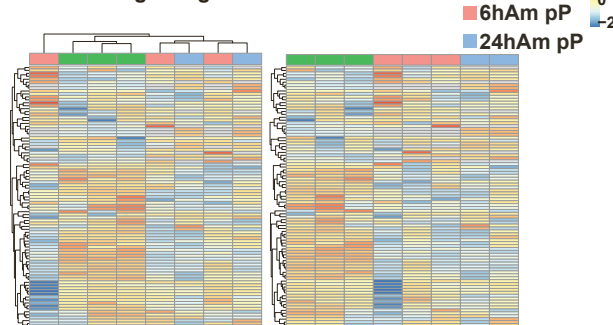

S.Fig 6

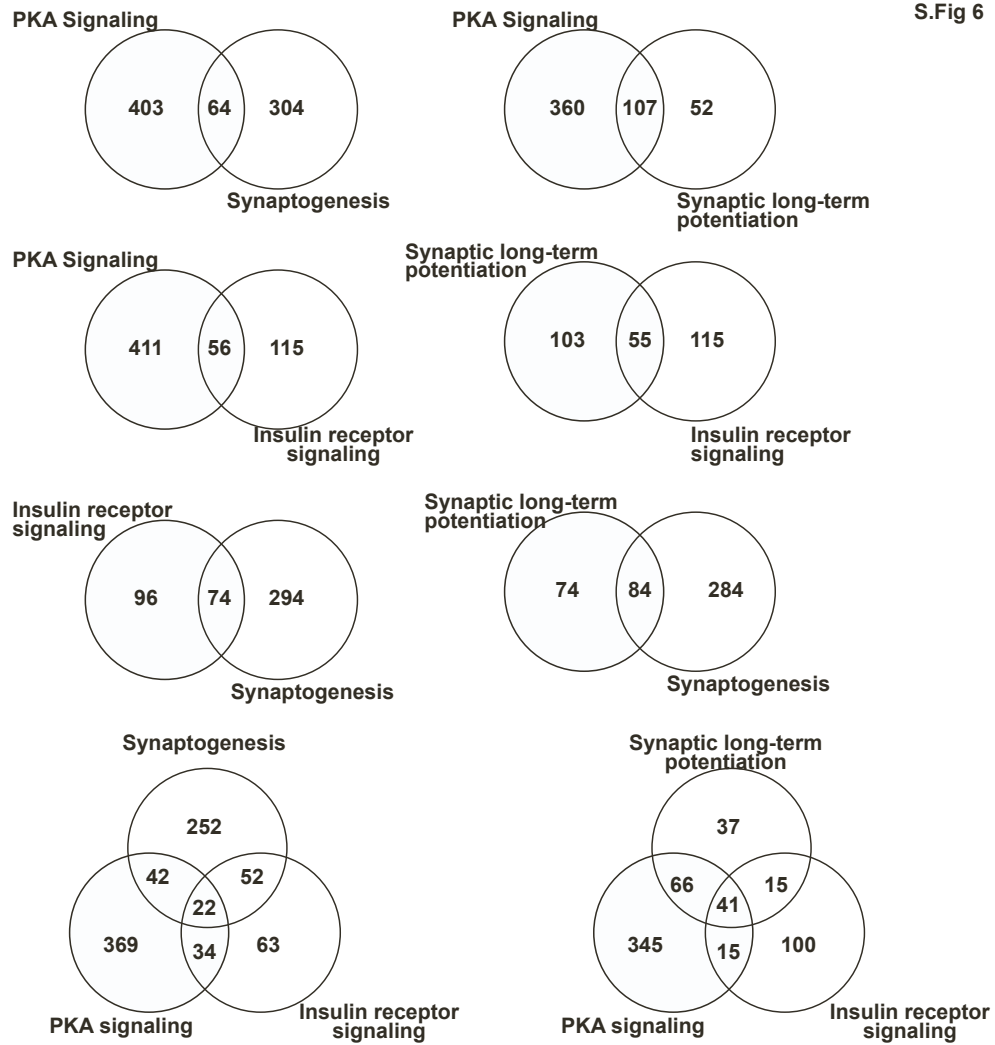

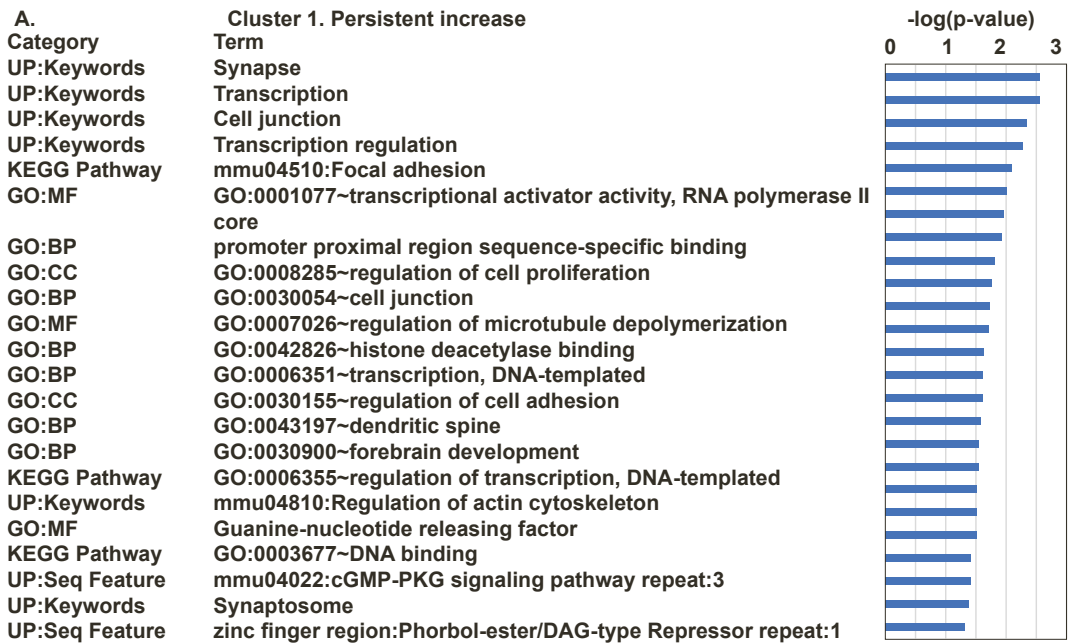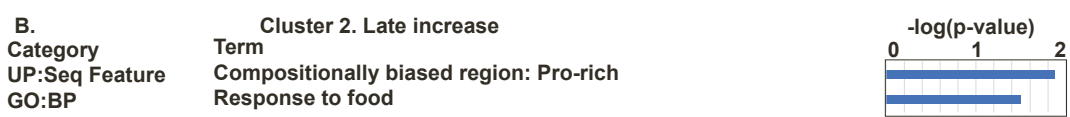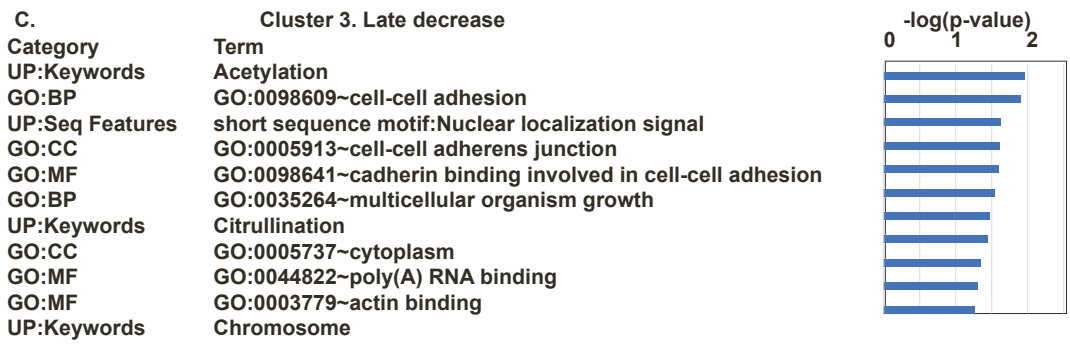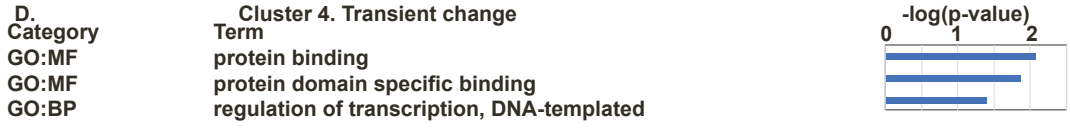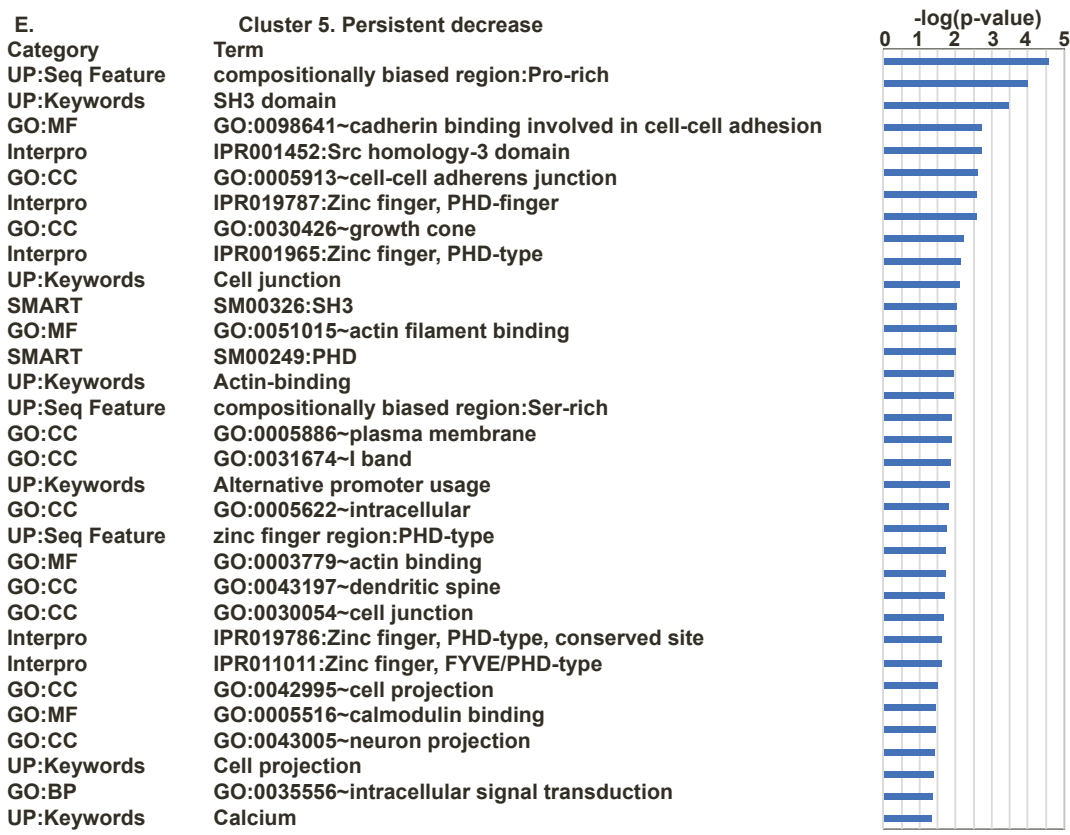



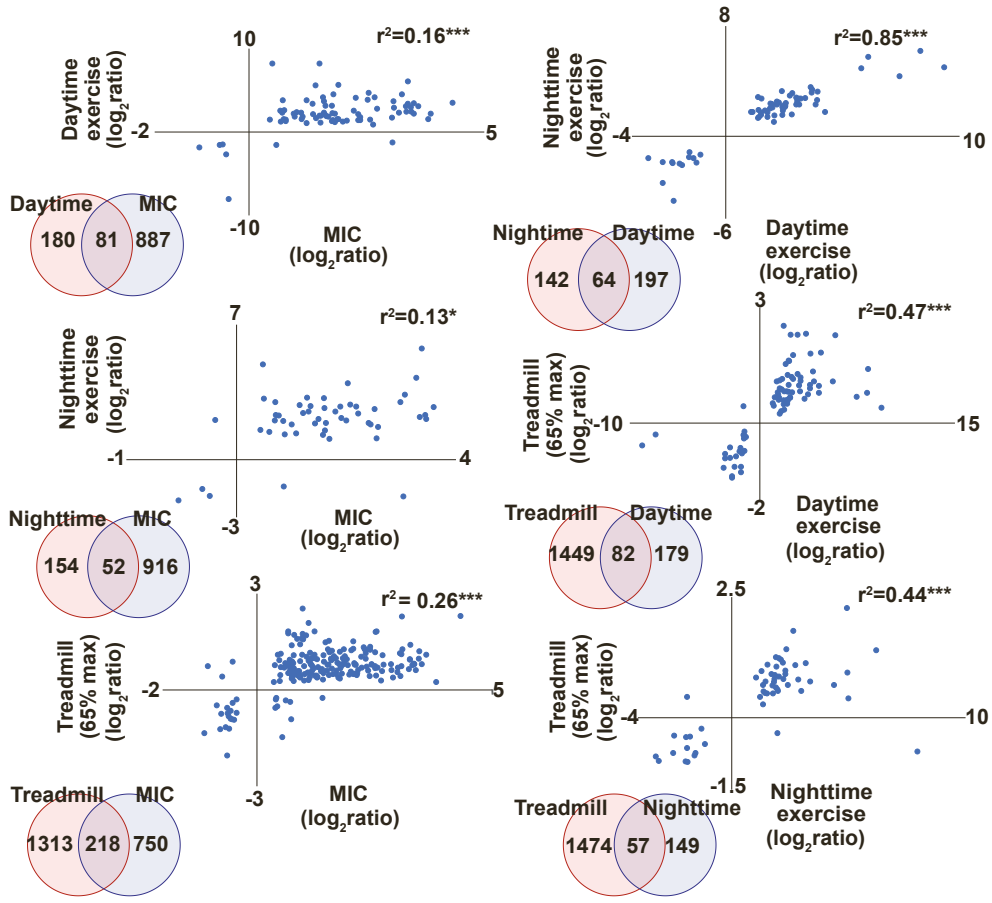

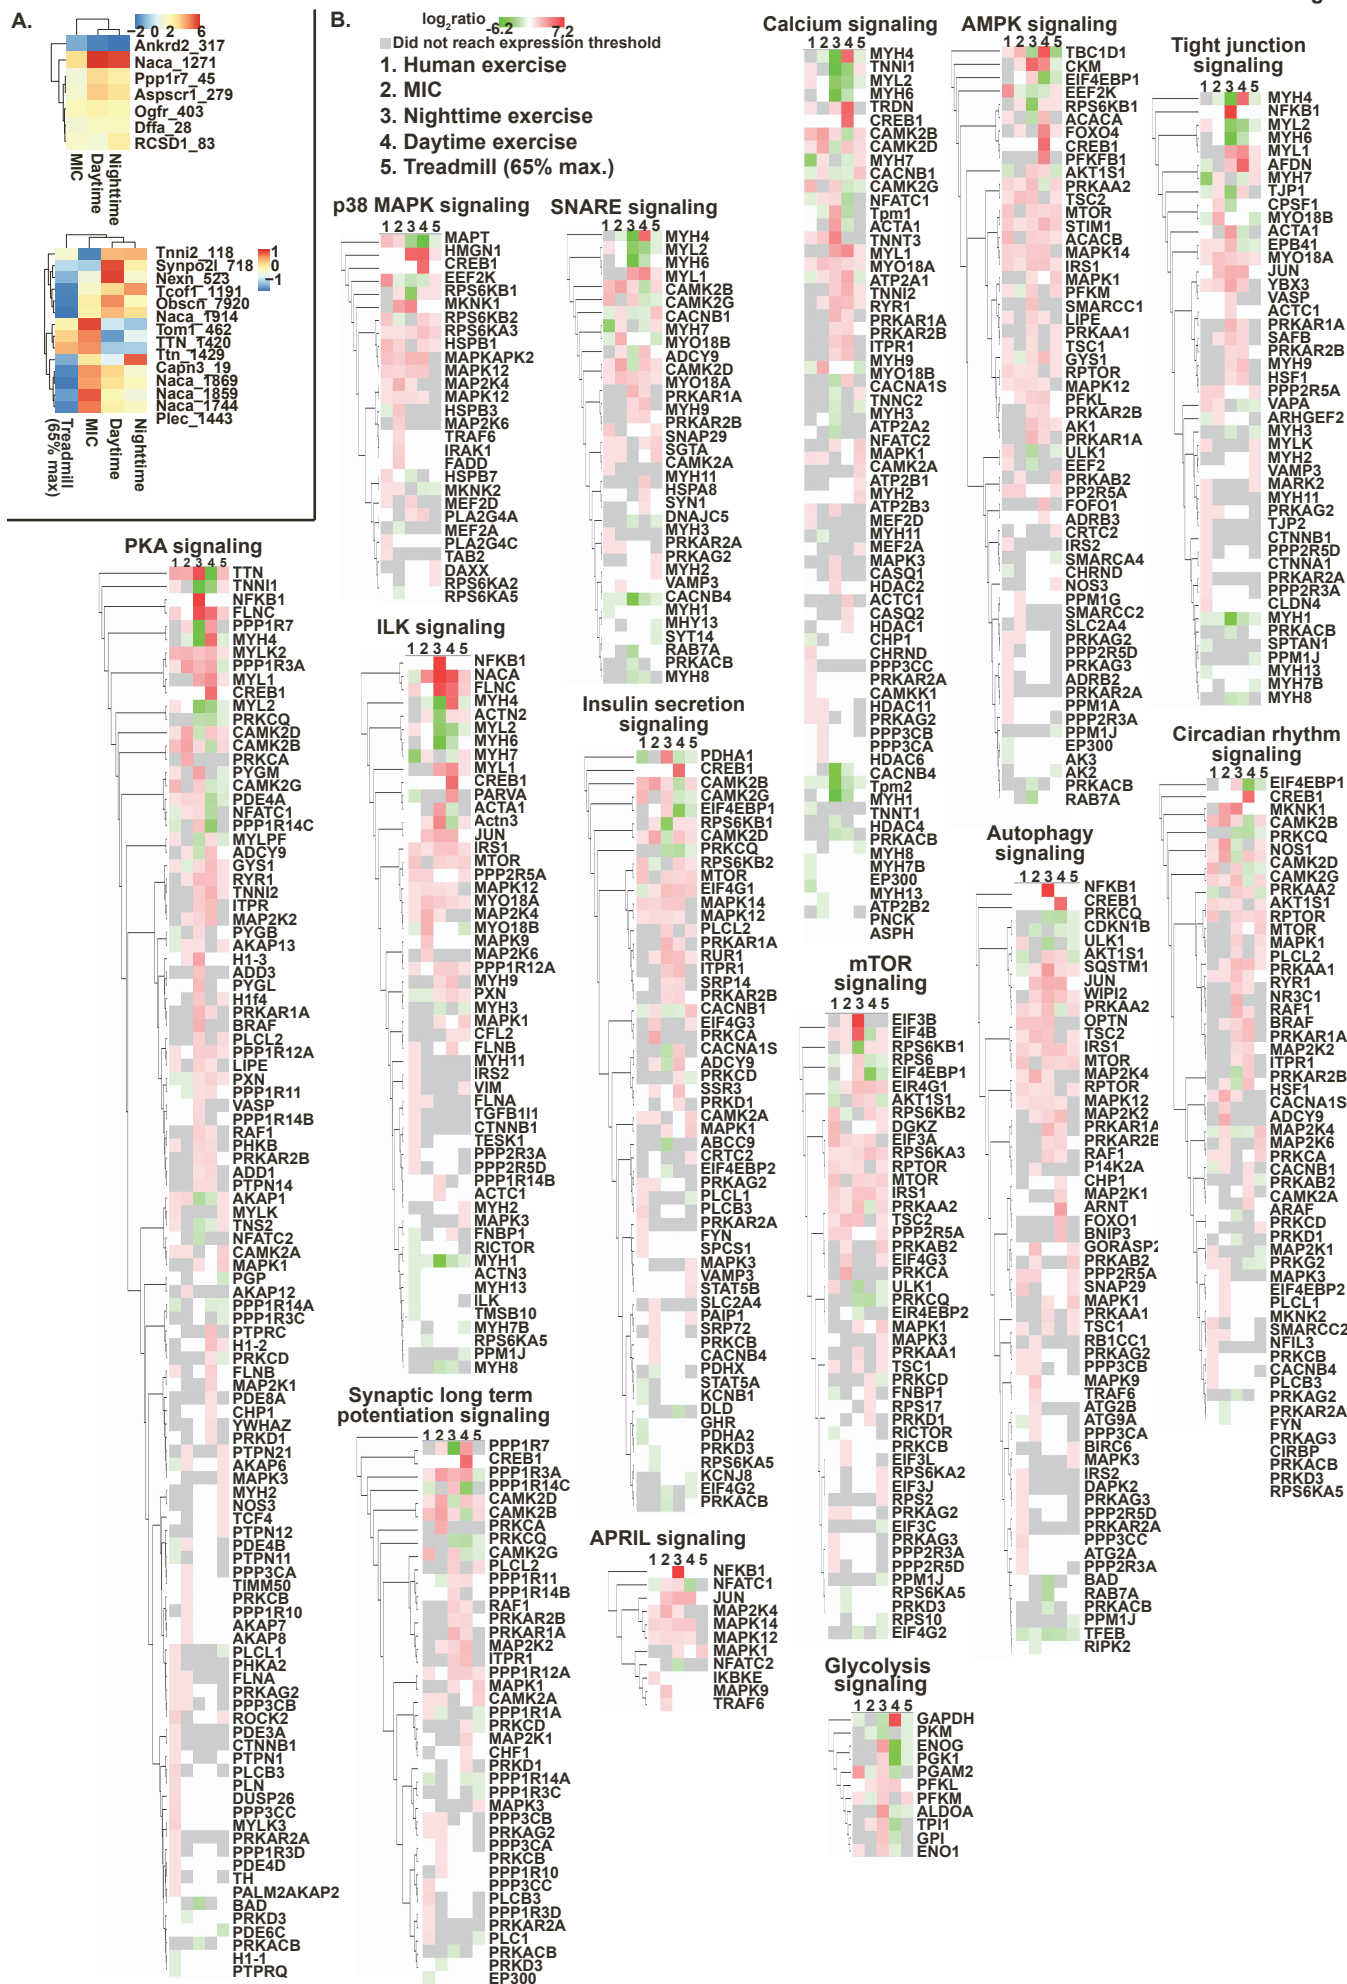

A. AKAP

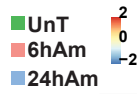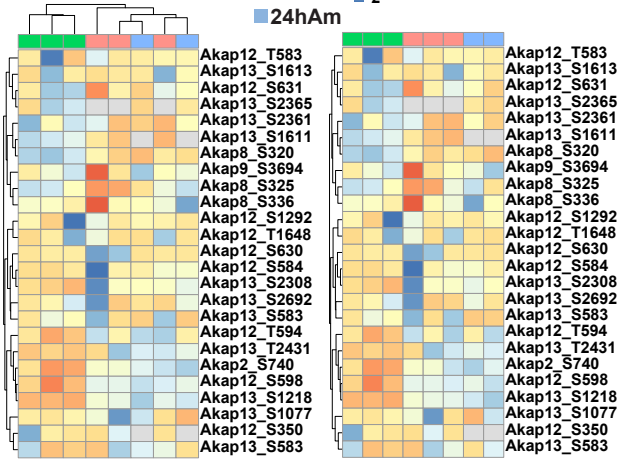

B.

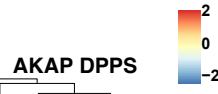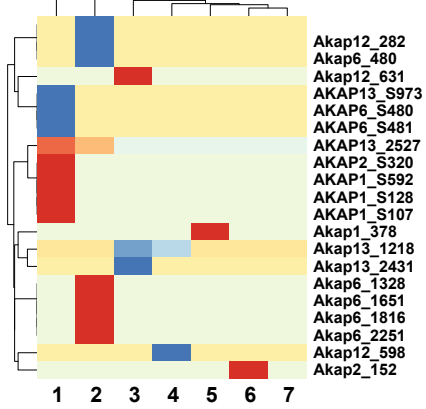

1. Human
2. Treadmill (65% max.)
3. 24h AmAc
4. 6h AmAc
5. MIC
6. Daytime exercise
7. Nighttime exercise

C. Enriched pathways in DEpP shared in AmAc and exercise (by model)

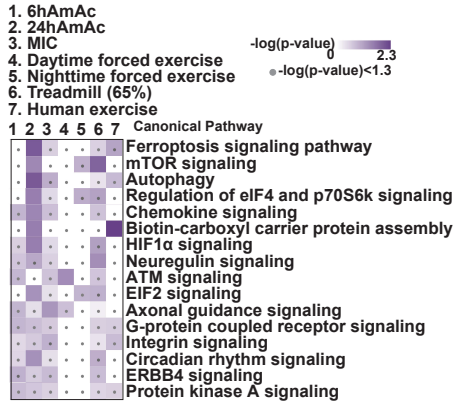

D. DEpP by AmAc dataset shared with exercise (24hAmAc representative)

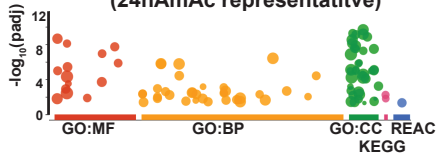

6hAmAc shared with exercise

- RNA binding
- Cytoskeletal protein binding
- Tubulin binding
- Enzyme binding
- Protein binding
- Guanyl-nucleotide exchange factor activity
- RNA splicing
- mRNA processing
- mRNA splicing
- mRNA transport
- RNA processing
- mRNA metabolic process
- Establishment of RNA localization
- Cell death signaling via NUAGE, NRIF, and NADE

24hAmAc shared with exercise

- RNA binding
- Calmodulin binding
- Cytoskeletal binding
- Actin binding
- Structural constituent of muscle
- Cadherin binding
- Cell adhesion molecule binding
- HIF1α signaling

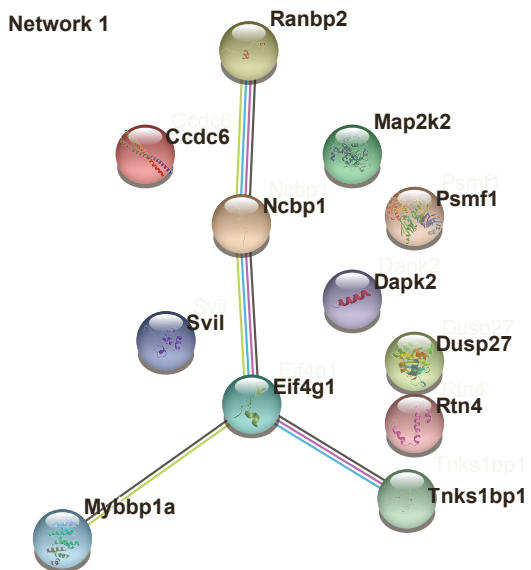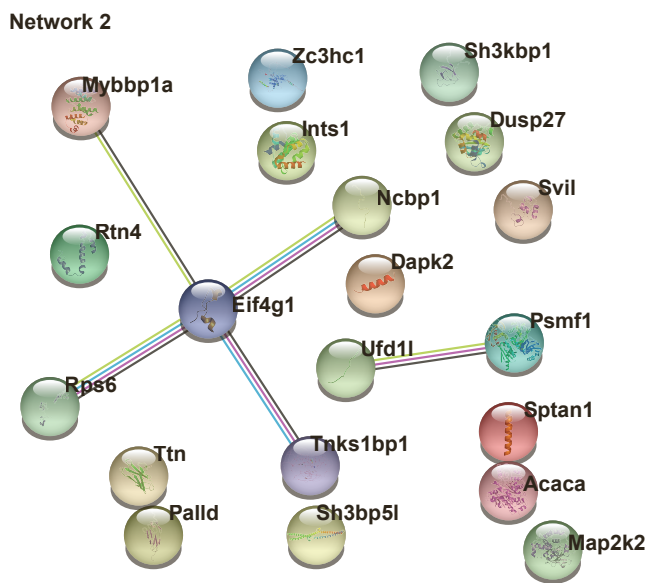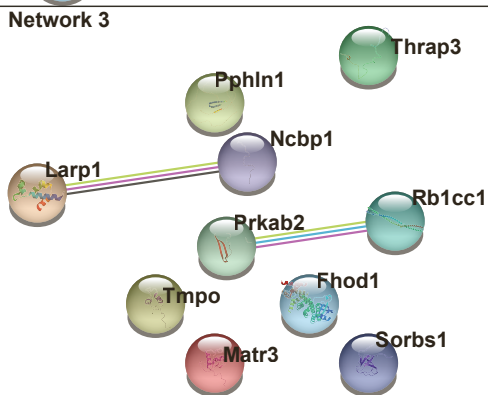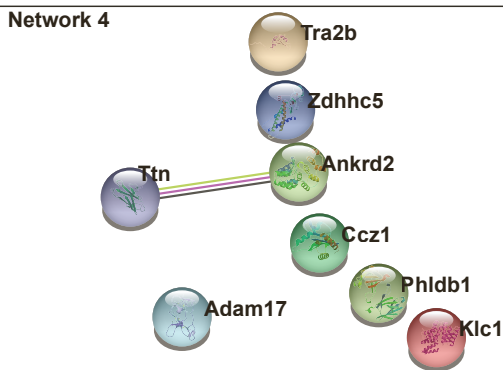

S.Fig 12

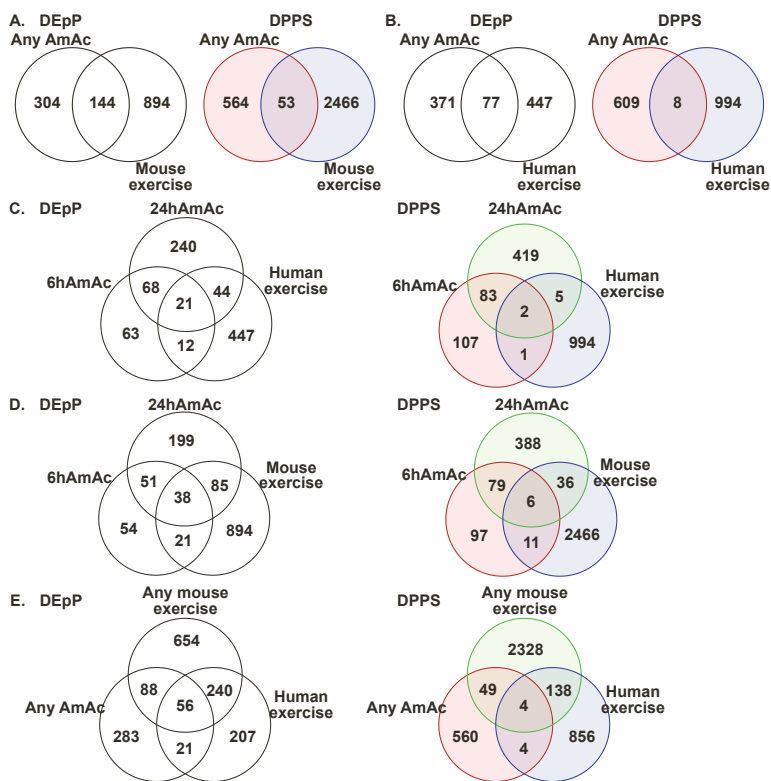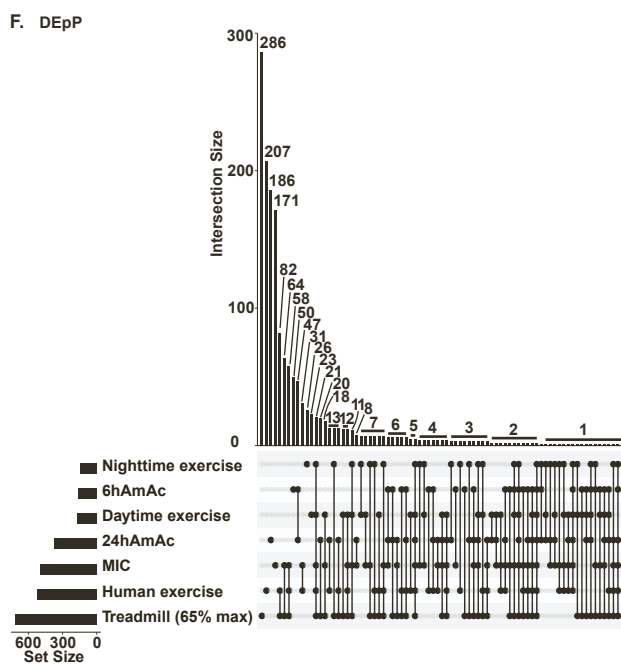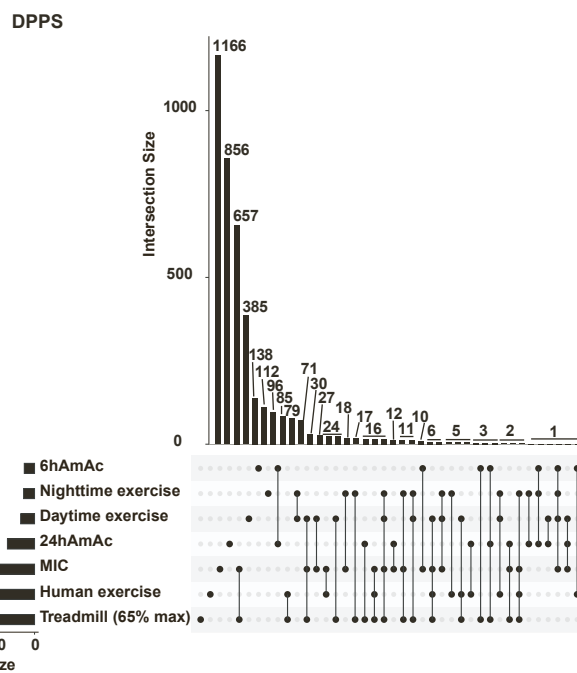



A. DEpP

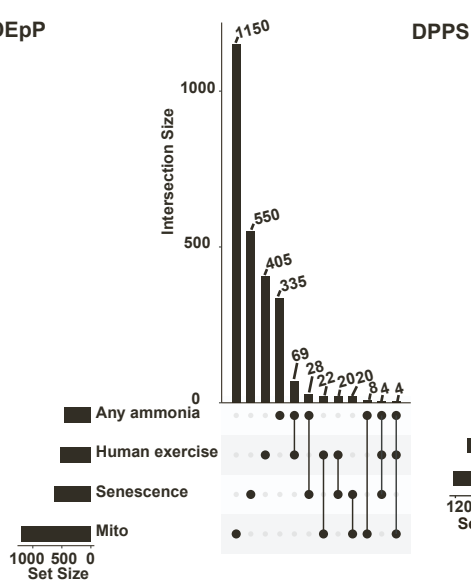

DPPS

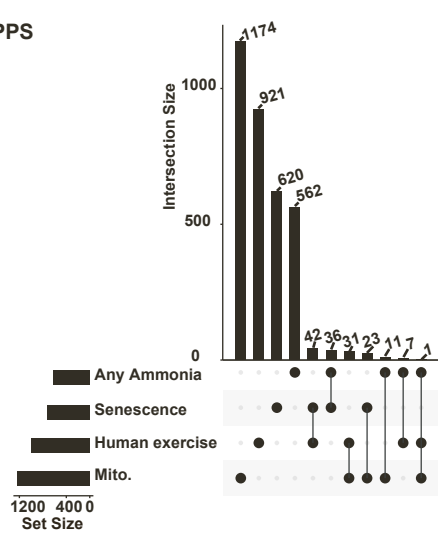

B.

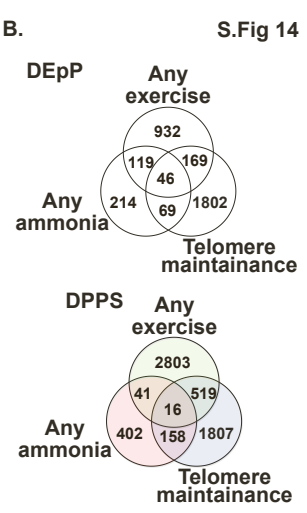

S.Fig 14

C. DEpP

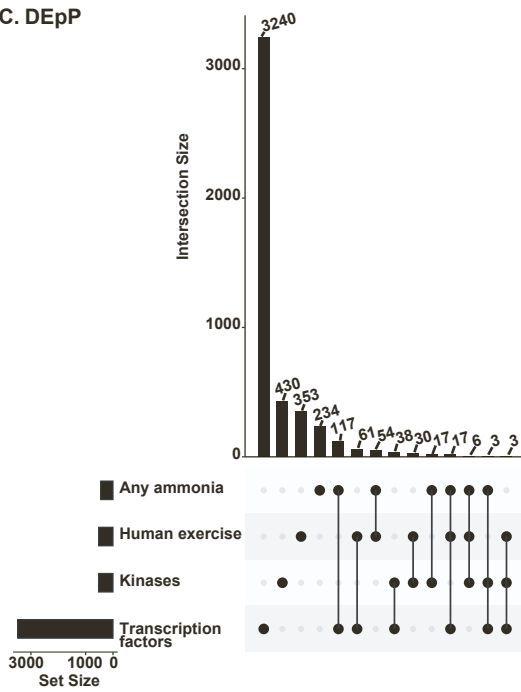

DPPS

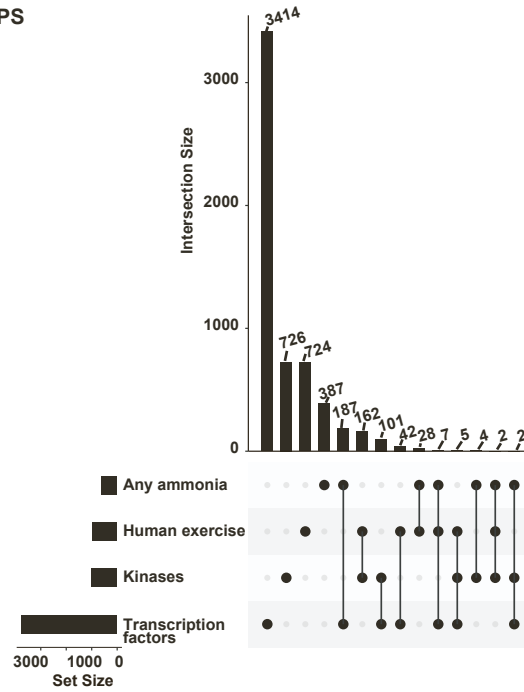

D. DEpP

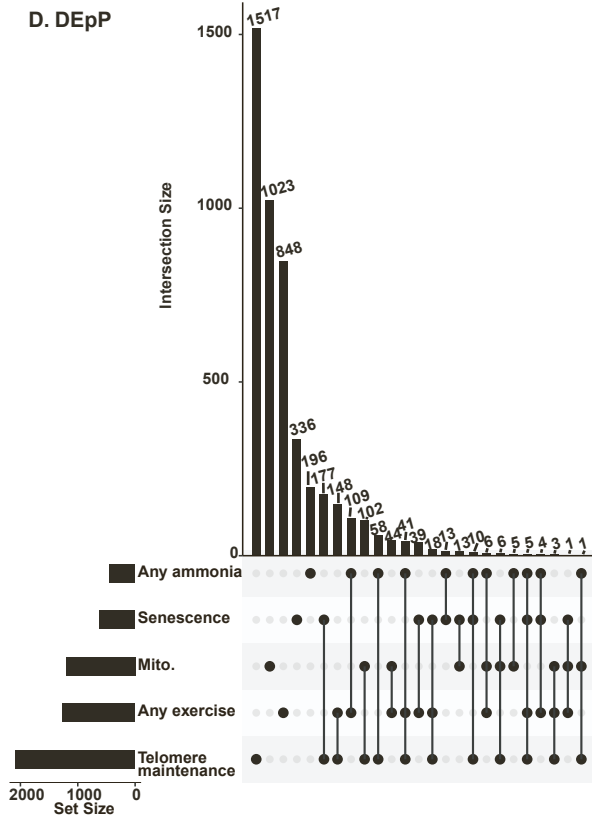

DPPS

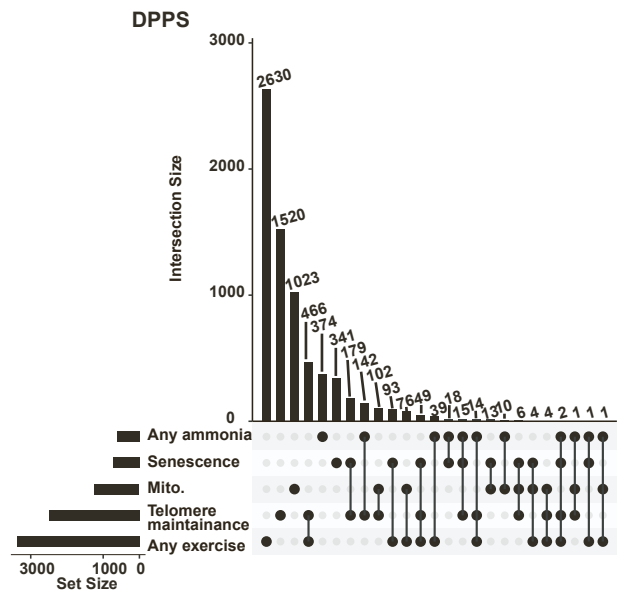

**A. TCA cycle**

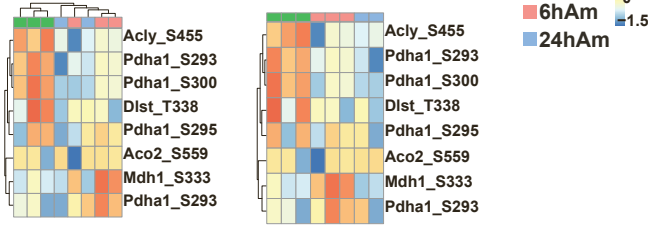

**OxPhos**

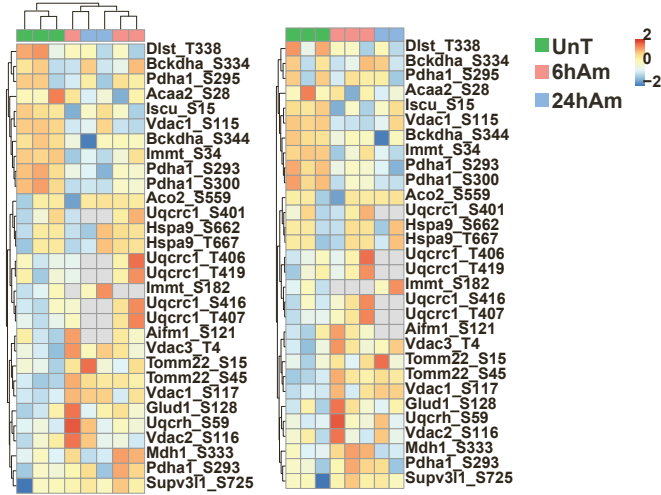

**B. TCA cycle (all models)**

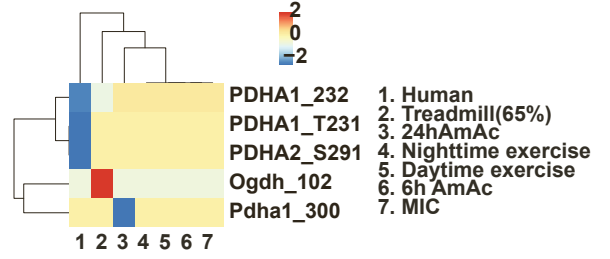

**Ox Phos (all models)**

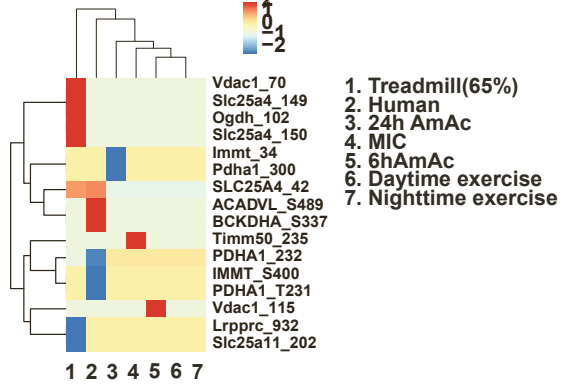

**C. Senescence**

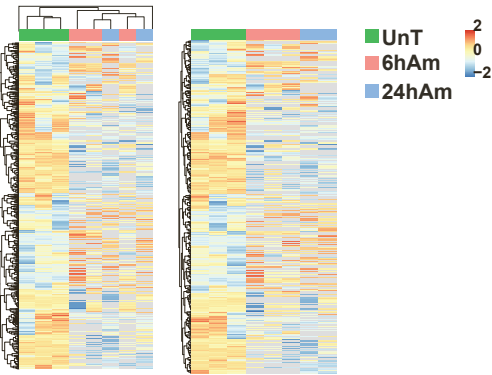

**D. Senescence (all models)**

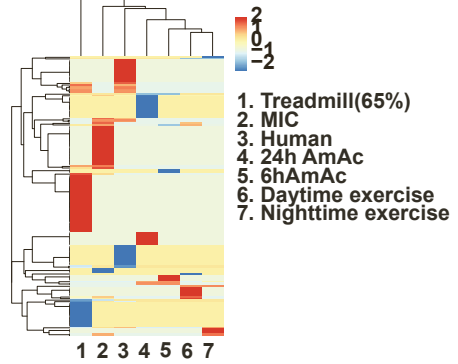

**E. PKA Synaptogenesis**

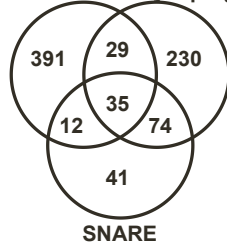

**APRIL ERK/MAPK**

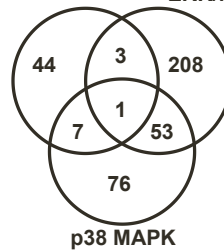

SNARE

p38 MAPK



S. Fig 16

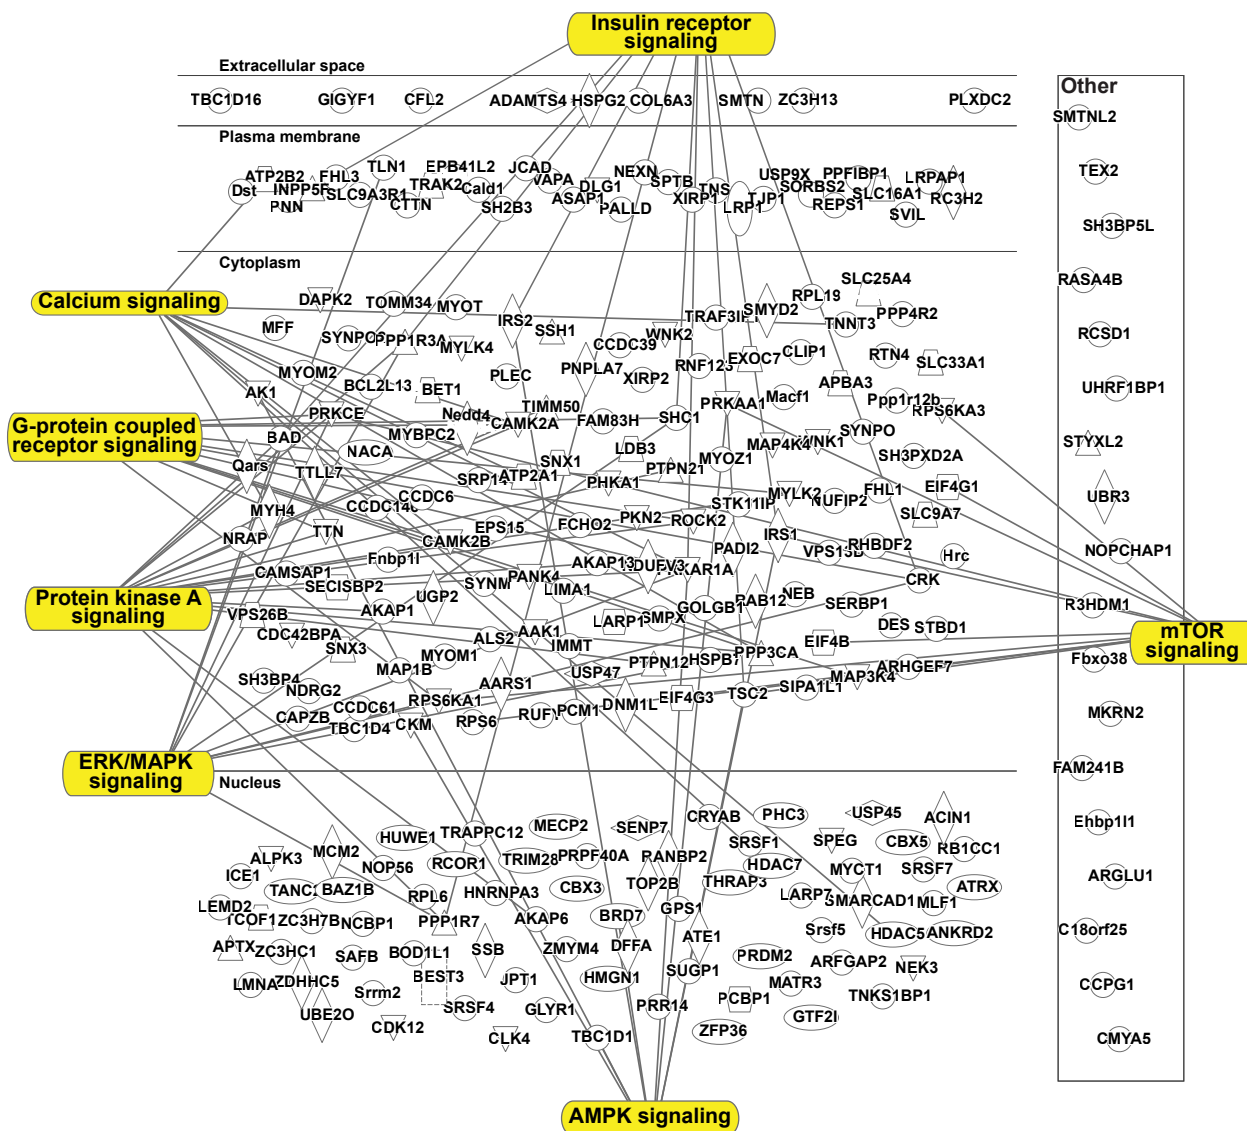

S.Fig 17

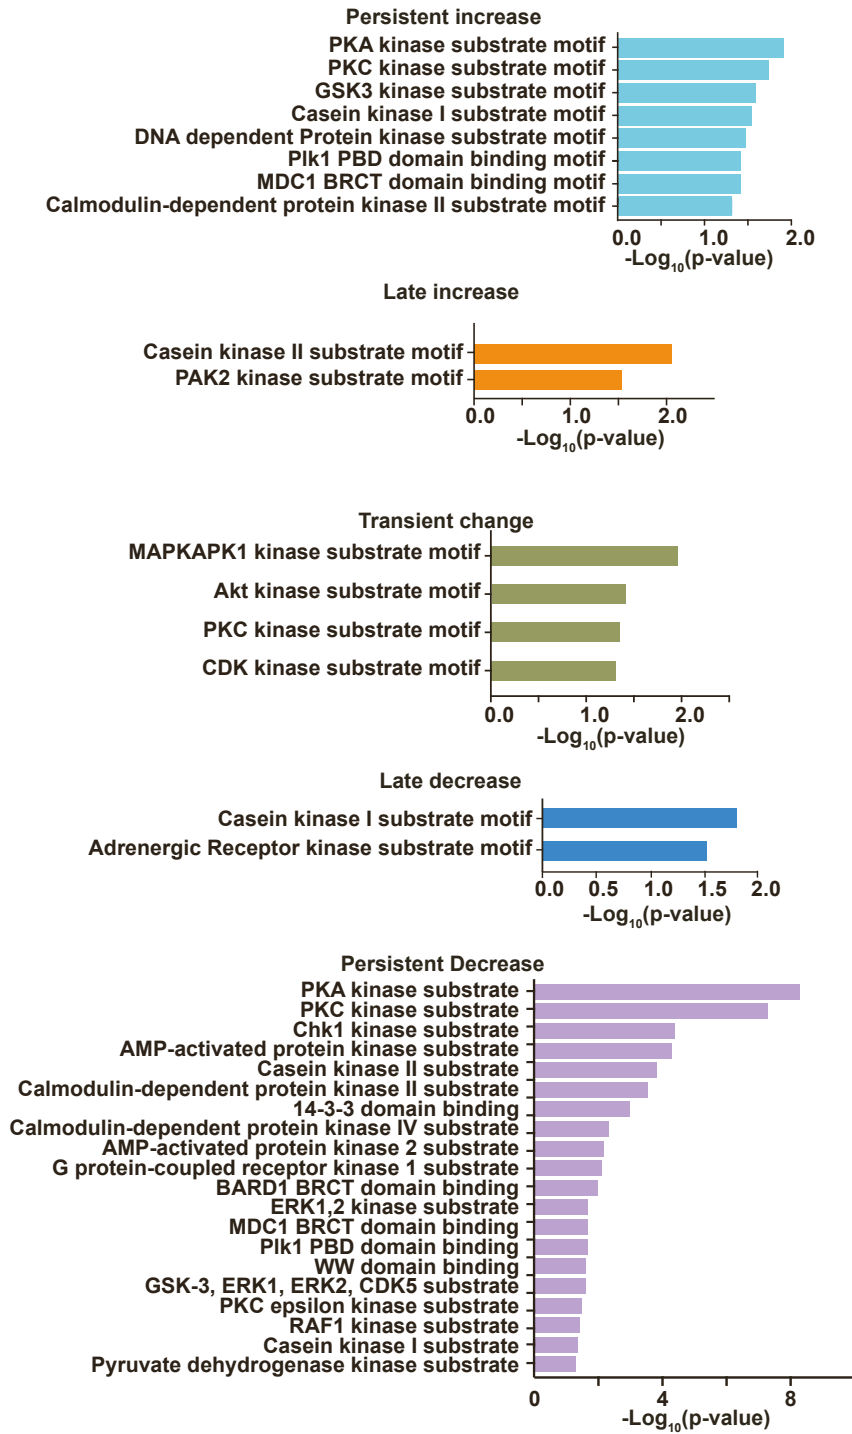

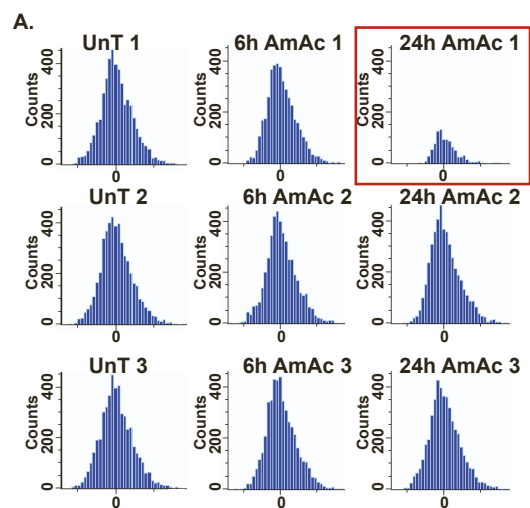

**B.**

| C2C12 myotube biological replicate | Identified phosphosites |
|------------------------------------|-------------------------|
| UnT 1                              | 5086                    |
| 6hAmAc 1                           | 4541                    |
| 24hAmAc 1                          | 1026                    |
| UnT 2                              | 5121                    |
| 6hAmAc 2                           | 5030                    |
| 24hAmAc 2                          | 5101                    |
| UnT 3                              | 5260                    |
| 6hAmAc 3                           | 5177                    |
| 24hAmAc 3                          | 5179                    |

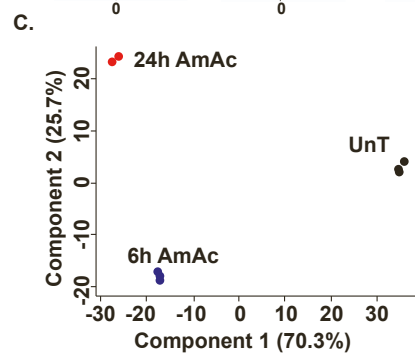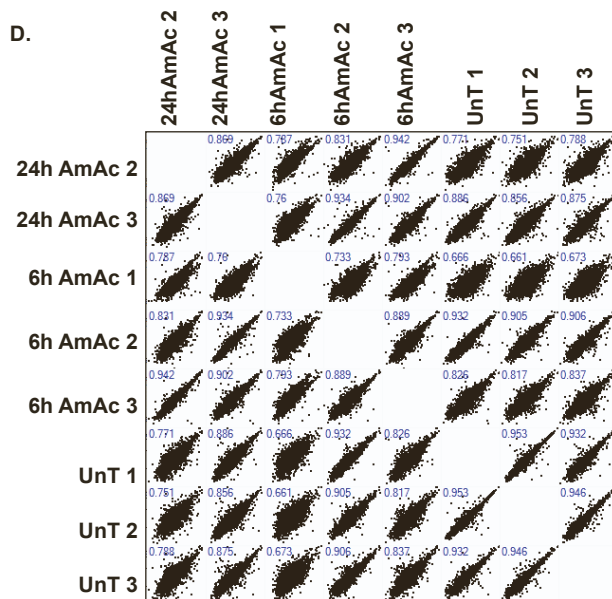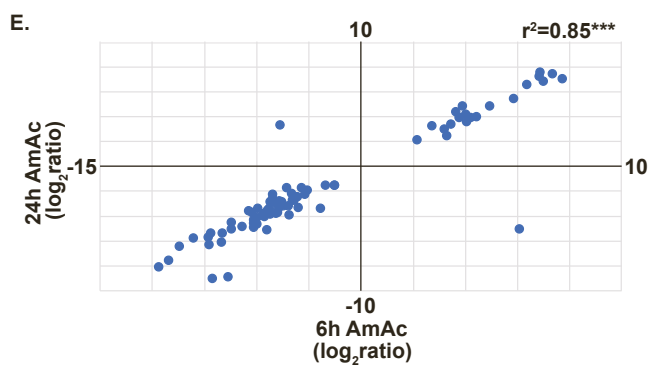

## Supplementary Figure Legends

**S.Fig 1. Most significant protein networks in the hyperammonemic datasets showed connections to PKA pathway proteins, related to Fig.1.** Differentially expressed phosphoproteins (DEpP) were identified in C2C12 myotubes treated with 10mM ammonium acetate (AmAc) for 6h and 24h. Interaction networks were generated from the DEpP followed by feature extraction to include molecules connected to protein kinase A within each dataset. All myotube experiments were done in n=3 biological replicates (one 24hAmAc replicate was removed from downstream analyses due to outlier status). Statistical significance cutoff for DEpP was  $p_{adj} < 0.05$  (Student's t-test with Benjamini-Hotchberg correction). Red color = increased phosphorylation compared to untreated. Green color = decreased phosphorylation compared to untreated controls.

**S.Fig 2. Comparison between untargeted proteomics and phosphoproteomics data in hyperammonemic myotubes, related to Fig.1.** **A.** Scatterplot of phosphoprotein expression data compared to proteomics expression data from the same protein in C2C12 myotubes treated with 24h 10mM ammonium acetate (AmAc). **B.** Venn diagram of unique and shared phosphoproteins and proteins, correlation bar graph showing direction of expression change vs control (positive vs. negative) for each shared protein/phosphoprotein that is differentially expressed at 24hAmAc in myotubes, and enriched pathways in differentially expressed phosphoproteins (DEpP) that are not regulated at the protein level and differentially expressed proteins (DEP) that are not regulated at the phosphorylation level. All experiments were done in n=3 biological replicates (one 24hAmAc replicate was removed from downstream analyses due to outlier status). Statistical significance cutoffs were  $p_{adj} < 0.05$  for phosphoproteomics and  $p < 0.05$  for proteomics to allow for similar numbers of differentially expressed molecules (vs untreated controls). NS= not significant.

**S.Fig 3. Phosphoproteomic landscape during hyperammonemia, related to Fig.2.** **A-C.** Pathway enrichment using IPA and DAVID, and heatmaps of the most enriched DAVID functional annotation clusters identified in the differentially expressed phosphoproteins (DEpP) unique to 6h ammonium acetate (AmAc) treatment, unique to 24hAmAc or those shared between 6hAmAc and 24hAmAc phosphoproteomics datasets in C2C12 myotubes. All experiments were done in n=3 biological replicates (one 24hAmAc replicate was removed from downstream analyses due to outlier status). Statistical significance cutoff for full datasets using

IPA was performed using both  $\log_2(\text{ratio}) > |2.5|$  and  $\text{padj} < 0.05$  (Student's t-test with Benjamini-Hotchberg false discovery rate correction (BH-FDR)). Foreground DEpP in DAVID analyses was  $\text{padj} < 0.05$ . IPA pathway significance cutoff was the default  $-\log(\text{p-value}) \geq 1.3$ . Perseus 1D analysis significance cutoff was the default  $\text{BH-FDR} > 0.02$ . Green color = DEpP identified in the data subset, Black color = DEpP not identified in the data subset.

**S.Fig 4. PKA signaling is altered by various molecules across molecular layers in C2C12 myotubes and in skeletal muscle, related to Fig.2. A.** Heatmap showing protein kinase A (PKA) pathway genes that were

differentially expressed during 6h and 24h of hyperammonemia (Am) in myotubes (vs. untreated; UnT) in assay for transposase accessible chromatin (ATACseq); and in transcriptomics and proteomics in hyperammonemic myotubes, mice (vs. phosphate buffered saline (PBS)-treated control mice) and human patients with cirrhosis (CIR) (vs healthy subjects (CTL)). **B.** Heatmap of PKA pathway differentially expressed phosphoproteins (DEpP). **C.** Unsupervised and supervised heatmaps showing phosphosite expression in untreated (UnT) myotubes and 6h and 24hAm myotubes in the PKA pathway. All experiments were done in  $n=3$  biological replicates (one 24hAmAc replicate was removed from downstream analyses due to outlier status). Statistical significance cutoff for differentially expressed molecules was performed using the following statistical cutoffs: for ATACseq  $p < 0.005$ ; RNAseq and phosphoproteomics in cells  $p \text{ adj} < 0.05$ ; proteomics in cells and tissue, and RNAseq in tissue  $p < 0.05$  ((Student's t-test with or without Benjamini-Hotchberg false discovery rate correction).

**S.Fig 5. Phosphoproteins identified within highly enriched pathways, related to Fig.2. A,B.** Unsupervised and supervised heatmaps showing phosphosite expression in myotubes treated with 6h and 24h of ammonium acetate (AmAc) that are components of cyclin dependent kinase, and polo-like kinase (PLK) signaling during 6h and 24h hyperammonemia in myotubes. **C.** Correlation matrix and interaction network of DPPS in the hyperammonemic (6h and 24h) datasets that were components of either PKA signaling or PLK signaling (Numbers show the phosphosite; #1 refers to PKA and #2 refers to PLK. **D,E.** Unsupervised and supervised heatmaps showing phosphosite expression in myotubes treated with 6h and 24h of ammonium acetate (AmAc) that are components of HIPPO signaling and hypoxia inducible factor  $1\alpha$  during 6h and 24h hyperammonemia

in myotubes. All myotube experiments were done in n=3 biological replicates (one 24hAmAc replicate was removed from downstream analyses due to outlier status). Statistical significance cutoffs were  $p \text{ adj} < 0.05$  for the differentially phosphorylated phosphosites. Numbers next to gene names refer to the phosphorylated residue within the mouse protein.

**S.Fig 6. Venn diagrams comparing molecules identified in critical signaling pathways in myotubes, related to Fig.3.** Venn diagram identifying unique and shared molecules across the protein kinase A (PKA), synaptogenesis, synaptic long-term potentiation, insulin receptor signaling in the Ingenuity Pathway Knowledge Database.

**S.Fig 7. Enriched GO, KEGG, and Uniprot processes within hyperammonemic myotube phosphoproteomics clusters, related to Fig.3.** Differentially phosphorylated phosphosites (DPPS) in C2C12 myotubes treated with 6h and 24h ammonium acetate (AmAc) compared to controls were identified and clustered according to their temporal pattern of change. Uniprot (UP) keywords, UP sequence (seq) features, Gene ontology biological processes (GO:BP), molecular functions (GO:MF), cellular components (GO:CC) and Kyoto Encyclopedia of Genes and Genomes (KEGG) pathways enriched in the **A.** Persistent increase (increased phosphorylation at both 6h and 24hAmAc compared to controls), **B.** Late increase (increased phosphorylation only at 24hAmAc compared to controls) clusters of DPPS. **C.** Late decrease (decreased phosphorylation only at 24hAmAc compared to controls) cluster of DPPS. **D.** Transient change (significant change in phosphorylation at 6hAmAc compared to controls but no difference between 24hAmAc treatment and control levels of phosphorylation) and **E.** Persistent decrease (decreased phosphorylation at both 6h and 24hAmAc compared to controls) clusters of DPPS. All experiments were done in n=3 biological replicates (one 24hAmAc replicate was removed from downstream analyses due to outlier status). Statistical significance cutoff for DPPS was  $p \text{ adj} < 0.05$  (Student's t-test with Benjamini-Hotchberg correction).

**S.Fig 8. Scatterplots correlating mouse exercise phosphoproteomics datasets, related to Fig.4.** Scatterplots, linear regressions, and Venn diagrams comparing differentially phosphorylated phosphosites (DPPS) expression ( $\log_2$  ratio) from published mouse exercise skeletal muscle phosphoproteomics datasets.

Statistical significance cutoff for DPPS was  $p_{adj} < 0.05$  (Student's t-test with Benjamini-Hotchberg correction). MIC= maximal (max.) intensity contraction, Treadmill (65% max.) exercise = mice exercised at 65% of their max. running speed on a treadmill, Daytime exercise = mice that underwent high-intensity treadmill running during the zeitgeber time (ZT)0 period of "lights on", Nighttime exercise = mice that underwent high-intensity treadmill running during the ZT12 period of "lights off".  $p < 0.05$ ; \*\*\*  $p < 0.001$

**S.Fig. 9. Shared differentially expressed phosphosites during exercise showed unique and shared pathway responses, related to Fig.4.** **A.** Heat maps showing skeletal muscle DPPS shared in all mouse models and shared within the male mouse models of exercise. **B.** Gene heatmaps of enriched pathways within the exercise datasets. Red is an increased expression and green is decreased expression related to respective controls. Duplicate DEpP were resolved using the greatest absolute value  $\log_2$ ratio. Numbers next to gene names refer to the phosphorylated residue within the mouse protein. MIC= maximal (max.) intensity contraction, Treadmill (65% max.) exercise = mice exercised at 65% of their max. running speed on a treadmill, Daytime exercise = mice that underwent high-intensity treadmill running during the zeitgeber time (ZT)0 period of "lights on", Nighttime exercise = mice that underwent high-intensity treadmill running during the ZT12 period of "lights off".

**S.Fig 10. Regulatory interaction of protein kinase A components in the exercise and hyperammonemia datasets, related to Fig.5.** **A.** Unsupervised and supervised heatmaps of phosphosite expression of A-kinase anchoring proteins (AKAP) in myotubes treated with 6h and 24h of ammonium acetate (AmAc). **B.** Heatmap of differentially phosphorylated phosphosites (DPPS) of AKAP across all datasets. **C.** Heatmap of enriched canonical pathways in each dataset from the subset of DEpP that are shared between at least one hyperammonemia dataset and at least one exercise dataset. **D.** Temporal analysis of enriched processes in DEpP at 6h and 24h AmAc with shared DEpP from any exercise dataset. All myotube experiments were done in  $n=3$  biological replicates (one 24hAmAc replicate was removed from downstream analyses due to outlier status). DEpP/DPPS was  $p_{adj} < 0.05$  (Student's t-test with Benjamini-Hotchberg correction) for ammonia and mouse data and  $p_{adj} < 0.05$  and expression fold change  $> |1.5|$  for human data. MIC= maximal (max.) intensity contraction, Treadmill (65% max.) exercise = mice exercised at 65% of their max. running speed on a

treadmill, Daytime exercise = mice that underwent high-intensity treadmill running during the zeitgeber time (ZT)0 period of “lights on”, Nighttime exercise = mice that underwent high-intensity treadmill running during the ZT12 period of “lights off”.

**S.Fig 11. Protein-protein interaction networks identified by functional enrichment analysis (STRING) of highly correlated differentially expressed phosphoproteins (DEpP), related to Fig.5.** C2C12 myotubes were treated with 6h and 24h of ammonium acetate (AmAc) and skeletal muscle from models of exercise in mouse and humans. STRING was used to identify interaction networks using known protein-protein interactions between DEpP. All myotube experiments were done in n=3 biological replicates (one 24hAmAc replicate was removed from downstream analyses due to outlier status). DEpP was  $\text{padj} < 0.05$  (Student's t-test with Benjamini-Hotchberg correction) for myotube data and  $\text{padj} < 0.05$  and expression fold change  $> |1.5|$  for human data.

**S.Fig 12. Unique and shared differentially expressed phosphorylation across hyperammonemia and exercise datasets, related to Fig.5.** **A.** Venn diagram showing differentially expressed phosphoproteins (DEpP) and differentially phosphorylated phosphosites (DPPS) present in at least one of the 6h or 24h ammonium acetate (AmAc)-treated myotube datasets compared to DEpP/DPPS present in at least one of the mouse exercise datasets. **B.** Venn diagram of DEpP and DPPS shared between any AmAc dataset and the human exercise dataset. **C.** Venn diagram of DEpP and DPPS shared between the 6h AmAc dataset, the 24h AmAc dataset, and the human exercise dataset. **D.** Venn diagram of DEpP and DPPS shared between the 6h AmAc dataset, the 24h AmAc dataset, and at least one of the mouse exercise datasets. **E.** Venn diagram of DEpP and DPPS shared between at least one of the hyperammonemia datasets, at least one of the mouse exercise datasets, and the human exercise dataset. **F.** Upset plot showing unique and shared DEpP and DPPS between each phosphoproteomics dataset analyzed. All myotube experiments were done in n=3 biological replicates (one 24hAmAc replicate was removed from downstream analyses due to outlier status). All mouse and human experiments from previously published manuscripts were done in at least n=3 individuals. DEpP/DPPS was  $\text{padj} < 0.05$  (Student's t-test with Benjamini-Hotchberg correction) for ammonia and mouse data and  $\text{padj} < 0.05$  and expression fold change  $> |1.5|$  for human data. MIC= maximal (max.)



intensity contraction, Treadmill (65% max.) exercise = mice exercised at 65% of their max. running speed on a treadmill, Daytime exercise = mice that underwent high-intensity treadmill running during the zeitgeber time (ZT)0 period of “lights on”, Nighttime exercise = mice that underwent high-intensity treadmill running during the ZT12 period of “lights off”.

**S.Fig 13. Shared DPPS on DEpP across all exercise and hyperammonemia datasets, related to Fig.5.**

Dot plot showing the expression level ( $\log_2$ ratio) of each differentially phosphorylated phosphosite (DPPS) on shared differentially expressed phosphoprotein (DEpP) in the hyperammonemia phosphoproteomics dataset, the human exercise phosphoproteomics dataset, and the following mouse exercise datasets: nighttime exercise, daytime exercise, treadmill exercise at 65% of maximal (max.) running speed, and max. intensity contractions (MIC) in the skeletal muscle of an anesthetized mouse. All myotube experiments were done in  $n=3$  biological replicates (one 24hAmAc replicate was removed from downstream analyses due to outlier status). DEpP/DPPS was  $\text{padj}<0.05$  (Student's t-test with Benjamini-Hochberg correction) for ammonia and mouse data and  $\text{padj}<0.05$  and expression fold change  $>|1.5|$  for human data. Daytime exercise = mice that underwent high-intensity treadmill running during the zeitgeber time (ZT)0 period of “lights on”, Nighttime exercise = mice that underwent high-intensity treadmill running during the ZT12 period of “lights off”.

**S.Fig 14. Comparative phosphoproteomics analysis of the unique and overlapping differentially expressed phosphoproteins (DPPS) and differentially phosphorylated phosphosites (DEpP), related to Fig.6.**

Untargeted phosphoproteomics was performed in C2C12 myotubes with 6h and 24h of ammonium acetate treatment. These data were compared to previously published phosphoproteomics data from muscle from human subjects and mice before and after exercise. **A.** Upset plots showing unique and shared genes between the human exercise DEpP/DPPS dataset, at least one hyperammonemia DEpP/DPPS dataset, a senescence gene database, and a mitochondrial gene database. **B.** Venn diagrams showing unique and shared genes between at least one exercise DPPS dataset, at least one hyperammonemia DEpP/DPPS dataset, and a telomere maintenance gene database. **C.** Upset plots showing unique and shared genes between at least one exercise DEpP/DPPS dataset, at least one hyperammonemia DEpP/DPPS dataset, a kinase database, and a transcription factor database. **D.** Upset plots showing unique and shared genes

between at least one exercise DEpP/DPPS dataset, at least one hyperammonemia DEpP/DPPS dataset, a database of senescence-related genes, a database of mitochondrial genes, and a database of telomere maintenance genes. DEpP/DPPS was  $p_{adj} < 0.05$  (Student's t-test with Benjamini-Hotchberg correction) for ammonia and mouse data and  $p_{adj} < 0.05$  and expression fold change  $> |1.5|$  for human data. All myotube experiments were done in  $n=3$  biological replicates (one 24hAmAc replicate was removed from downstream analyses due to outlier status). All mouse and human experiments from previously published manuscripts were done in at least  $n=3$  individuals. Mito. = Verified mitochondrial genes from the MitoCarta3.0 database. Any ammonia = DPPS was present in at least one of either the 6h or 24hAmAc datasets. Any exercise = DPPS was present in at least one of the exercise datasets (mice or human).

**S.Fig.15. Phosphorylation of mitochondrial and senescence pathway genes, related to Fig.6. A.**

Supervised and unsupervised heatmaps of phosphosite expression of tricarboxylic acid (TCA) cycle and oxidative phosphorylation (OxPhos; electron transport chain) components in myotubes treated with 6h and 24h of ammonium acetate (AmAc). **B.** Heatmap of differentially phosphorylated phosphosites (DPPS) of TCA cycle and OxPhos. components in myotubes treated with 6h and 24h of ammonium acetate (AmAc) and any exercise dataset. **C.** Supervised and unsupervised heatmaps of phosphosite expression of senescence components in hyperammonemic myotubes. **D.** Heatmap of DPPS of senescence components in myotubes treated with 6h and 24h of AmAc and any exercise dataset. **E.** Venn diagrams identifying unique and shared molecules across the protein kinase A (PKA), synaptogenesis, synaptosome associated protein receptor (SNARE) and APRIL (A proliferation-inducing ligand), extracellular signal regulated kinase (ERK)-mitogen-activated protein kinase (MAPK), and p38 MAPK pathways in the Ingenuity Pathway Analysis Qiagen Knowledgebase.

**S.Fig. 16. Connectivity network of multiple levels of interactions and regulation by canonical during exercise and hyperammonemia, related to Fig.7.** Motifs were identified for the hyperammonemic, mice and human exercise differentially phosphorylated phosphosites (DPPS) and proteins with protein kinase A (PKA) binding sites were mapped based on canonical pathway enrichments in the Ingenuity Pathway Knowledge Database.

**S.Fig 17. Motifs enriched in temporal clusters of differentially phosphorylated phosphosites, related to Fig.7.** Persistent increase (increased phosphorylation at 6h and 24h of ammonium acetate (AmAc) treatment compared to controls), Late increase (increased phosphorylation at 24h AmAc compared to controls but no change at 6hAmAc compared to controls), Late decrease (decreased phosphorylation at 24hAmAc compared to controls but not at 6hAmAc compared to controls), Transient change (change in phosphorylation at 6hAmAc and return to control levels of phosphorylation at 24hAmAc), Persistent decrease (decrease in phosphorylation at both 6h and 24hAmAc compared to controls) clusters of differentially phosphorylated phosphosites (DPPS) were analyzed and motifs enriched in each of the five DPPS clusters were identified. All experiments were done in n=3 biological replicates (one 24hAmAc replicate was removed from downstream analyses due to outlier status). Statistical significance cutoff for DPPS was  $p_{adj} < 0.05$  (Student's t-test with Benjamini-Hotchberg correction).

**S.Fig 18. Quality control for C2C12 hyperammonemia phosphoproteomics datasets, related to STAR**

**Methods. A.** Read counts for phosphorylated peptides in each dataset. Red box indicates the outlier sample. **B.** Number of phosphorylated peptides identified in each biological replicate and each treatment group for the phosphoproteomics dataset of C2C12 myotubes treated with 10mM ammonium acetate (AmAc) including the outlier sample. **C.** PCA plot for the hyperammonemic myotube phosphoproteomics dataset with outlier sample removed. **D.** Correlation quality control plot for the hyperammonemic phosphoproteomics dataset with outlier sample removed. **E.** Scatterplot comparing shared differentially phosphorylated phosphosites (DPPS) between the 6hAmAc phosphoproteomics dataset and the 24hAmAc phosphoproteomics dataset. All myotube experiments were done in n=3 biological replicates (one 24hAmAc replicate was removed from downstream analyses due to outlier status).

## ST1. Index to Supplementary Tables

| S.Table Number | Figure supported  | Topic                                                                                                                     |
|----------------|-------------------|---------------------------------------------------------------------------------------------------------------------------|
| ST1            | None              | Index to Supplementary Tables, related to STAR Methods                                                                    |
| ST2            | Fig.1,A-C         | AmAc phosphoproteomic landscape, related to Fig.1                                                                         |
| ST3            | S.Fig.1           | AmAc network data, related to Fig.1                                                                                       |
| ST4            | S.Fig.2,A,B       | AmAc phosphoproteomics vs proteomics, related to Fig.1                                                                    |
| ST5            | Fig.2,A,B         | AmAc functional enrichment, related to Fig.2                                                                              |
| ST6            | S.Fig.3,A-C       | AmAc pathway and heatmaps, related to Fig.2                                                                               |
| ST7            | S.Fig.4,A-C       | AmAc PKA heatmaps, related to Fig.2                                                                                       |
| ST8            | S.Fig.5,A-E       | Highly enriched pathway components, related to Fig.2                                                                      |
| ST9            | S.Fig.6           | Molecules shared between pathways, related to Fig.3                                                                       |
| ST10           | Fig.3,A-F         | Cluster IPA pathways, related to Fig.3                                                                                    |
| ST11           | S.Fig.7,A-E       | DAVID annotated hyperammonemia clusters, related to Fig.3                                                                 |
| ST12           | Fig.4,A-E         | Differentially expressed phosphoproteins in exercise datasets, related to Fig.4                                           |
| ST13           | S.Fig.8           | Mouse vs. mouse scatter plots and Venns, related to Fig.4                                                                 |
| ST14           | S.Fig.9,A,B       | Exercise heatmaps, related to Fig.4                                                                                       |
| ST15           | Fig.5,A,B,E,F,G,H | AmAc and exercise comparison analyses, related to Fig.5                                                                   |
| ST16           | S.Fig.10,A-D      | AKAP for exercise and AmAc shared DPPS, related to Fig.5                                                                  |
| ST17           | S.Fig.11          | STRING for exercise and AmAc shared DPPS, related to Fig.5                                                                |
| ST18           | (text only)       | PKA signaling pathway molecules, related to Fig.2                                                                         |
| ST19           | S.Fig.12,A-F      | Venn diagrams comparing DEpP/DPPS in AmAc myotubes and mouse & human skeletal muscle with exercise, related to Fig.5      |
| ST20           | S.Fig.13          | All phosphosites scatter, related to Fig.5                                                                                |
| ST21           | Fig.6,A-D         | Comparison of AmAc and exercise datasets with verified databases and shared canonical pathways and DPPS, related to Fig.6 |
| ST22           | S.Fig.14,A-D      | Comparison of DEpP, DPPS to verified databases, related to Fig.6                                                          |
| ST23           | S.Fig.15,A-E      | Mitochondrial and senescence heatmaps, related to Fig.6                                                                   |
| ST24           | Fig.7,A-E         | Motifs and predicted kinases identified in all datasets, related to Fig.7                                                 |
| ST25           | S.Fig.16          | Proteins shared in PKA motif prediction, related to Fig.7                                                                 |
| ST26           | S.Fig.17          | Motifs enriched in hyperammonemic clusters, related to Fig.7                                                              |
| ST27           | (text only)       | Searchable all mouse & human data, related to STAR Methods                                                                |
| ST28           | S.Fig.18          | Ammonia phosphoproteomics QC, related to STAR Methods                                                                     |

Abbreviations: AKAP: A-kinase anchoring protein, AmAc: Ammonium acetate, DEpP: Differentially expressed phosphoprotein, DPPS: Differentially phosphorylated phosphosite, Fig: Figure, S.Fig: Supplementary figure; ST: Supplementary Table; IPA: Ingenuity Pathway Analysis; PKA: Protein kinase A; QC: Quality control
